# Supplementary material for: Longitudinal Youth in Transition Study (LYiTS): protocol for a multicentre prospective cohort study of youth transitioning out of child and adolescent mental health services at age 18
Source: PubMed Central journal article supplement — BMJ Open. 2020 Feb 12;10(2):e035744. doi: 10.1136/bmjopen-2019-035744 (PMC7044859; doi:10.1136/bmjopen-2019-035744), 2020-02-12
Supplement: bmjopen-2019-035744.draft_revisions.pdf [file bmjopen-2019-035744.draft_revisions.pdf]

# BMJ Open

BMJ Open is committed to open peer review. As part of this commitment we make the peer review history of every article we publish publicly available.

When an article is published we post the peer reviewers' comments and the authors' responses online. We also post the versions of the paper that were used during peer review. These are the versions that the peer review comments apply to.

The versions of the paper that follow are the versions that were submitted during the peer review process. They are not the versions of record or the final published versions. They should not be cited or distributed as the published version of this manuscript.

BMJ Open is an open access journal and the full, final, typeset and author-corrected version of record of the manuscript is available on our site with no access controls, subscription charges or pay-per-view fees (<http://bmjopen.bmj.com>).

If you have any questions on BMJ Open's open peer review process please email [info.bmjopen@bmj.com](mailto:info.bmjopen@bmj.com)

# BMJ Open

## Longitudinal Youth in Transition Study (LYiTS): Protocol for a multi-centre prospective cohort study of youth transitioning out of child and adolescent mental health services at age 18

|                               |                                                                                                                                                                                                                                                                                                                                                                                                                                                                                                                                                                                                                                                                                                                                                                                                                                                                                                                                                                                                                                                                                                                                                                                                                                                                                      |
|-------------------------------|--------------------------------------------------------------------------------------------------------------------------------------------------------------------------------------------------------------------------------------------------------------------------------------------------------------------------------------------------------------------------------------------------------------------------------------------------------------------------------------------------------------------------------------------------------------------------------------------------------------------------------------------------------------------------------------------------------------------------------------------------------------------------------------------------------------------------------------------------------------------------------------------------------------------------------------------------------------------------------------------------------------------------------------------------------------------------------------------------------------------------------------------------------------------------------------------------------------------------------------------------------------------------------------|
| Journal:                      | <i>BMJ Open</i>                                                                                                                                                                                                                                                                                                                                                                                                                                                                                                                                                                                                                                                                                                                                                                                                                                                                                                                                                                                                                                                                                                                                                                                                                                                                      |
| Manuscript ID                 | bmjopen-2019-035744                                                                                                                                                                                                                                                                                                                                                                                                                                                                                                                                                                                                                                                                                                                                                                                                                                                                                                                                                                                                                                                                                                                                                                                                                                                                  |
| Article Type:                 | Protocol                                                                                                                                                                                                                                                                                                                                                                                                                                                                                                                                                                                                                                                                                                                                                                                                                                                                                                                                                                                                                                                                                                                                                                                                                                                                             |
| Date Submitted by the Author: | 13-Nov-2019                                                                                                                                                                                                                                                                                                                                                                                                                                                                                                                                                                                                                                                                                                                                                                                                                                                                                                                                                                                                                                                                                                                                                                                                                                                                          |
| Complete List of Authors:     | Cleverley, Kristin; University of Toronto, Lawrence S. Bloomberg Faculty of Nursing; Centre for Addiction and Mental Health<br>Bennett, Kathryn; McMaster University Faculty of Health Sciences, Health Research Methods, Evidence and Impact (formerly Clinical Epidemiology and Biostatistics)<br>Brennenstuhl, Sarah; University of Toronto, Lawrence S. Bloomberg Faculty of Nursing<br>Cheung, Amy; Sunnybrook Health Sciences Centre; University of Toronto Faculty of Medicine, Psychiatry<br>Henderson, Joanna; Centre for Addiction and Mental Health, ; University of Toronto Faculty of Medicine, Psychiatry<br>Korczak, Daphne J.; Hospital for Sick Children Department of Psychiatry<br>Kurdyak, Paul; Centre for Addiction and Mental Health<br>Levinson, Andrea; University of Toronto, Faculty of Medicine; Centre for Addiction and Mental Health<br>Pignatiello, Antonio; University of Toronto Faculty of Medicine; Hospital for Sick Children Department of Psychiatry<br>Stinson, Jennifer; Hospital for Sick Children; University of Toronto, Lawrence S. Bloomberg Faculty of Nursing<br>Voineskos, Aristotle; Centre for Addiction and Mental Health; University of Toronto, Faculty of Medicine<br>Szatmari, Peter; Centre for Addiction and Mental Health |
| Keywords:                     | cohort study, MENTAL HEALTH, health care transitions, longitudinal, youth                                                                                                                                                                                                                                                                                                                                                                                                                                                                                                                                                                                                                                                                                                                                                                                                                                                                                                                                                                                                                                                                                                                                                                                                            |
|                               |                                                                                                                                                                                                                                                                                                                                                                                                                                                                                                                                                                                                                                                                                                                                                                                                                                                                                                                                                                                                                                                                                                                                                                                                                                                                                      |

SCHOLARONE™  
Manuscripts

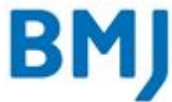

I, the Submitting Author has the right to grant and does grant on behalf of all authors of the Work (as defined in the below author licence), an exclusive licence and/or a non-exclusive licence for contributions from authors who are: i) UK Crown employees; ii) where BMJ has agreed a CC-BY licence shall apply, and/or iii) in accordance with the terms applicable for US Federal Government officers or employees acting as part of their official duties; on a worldwide, perpetual, irrevocable, royalty-free basis to BMJ Publishing Group Ltd ("BMJ") its licensees and where the relevant Journal is co-owned by BMJ to the co-owners of the Journal, to publish the Work in this journal and any other BMJ products and to exploit all rights, as set out in our [licence](#).

The Submitting Author accepts and understands that any supply made under these terms is made by BMJ to the Submitting Author unless you are acting as an employee on behalf of your employer or a postgraduate student of an affiliated institution which is paying any applicable article publishing charge ("APC") for Open Access articles. Where the Submitting Author wishes to make the Work available on an Open Access basis (and intends to pay the relevant APC), the terms of reuse of such Open Access shall be governed by a Creative Commons licence – details of these licences and which [Creative Commons](#) licence will apply to this Work are set out in our licence referred to above.

Other than as permitted in any relevant BMJ Author's Self Archiving Policies, I confirm this Work has not been accepted for publication elsewhere, is not being considered for publication elsewhere and does not duplicate material already published. I confirm all authors consent to publication of this Work and authorise the granting of this licence.

1  
2  
3 **Title:** Longitudinal Youth in Transition Study (LYiTS):  
4 Protocol for a multi-centre prospective cohort study of youth transitioning out of child and  
5 adolescent mental health services at age 18.  
6  
7  
8

9 **Authors:**

10 Kristin Cleverley RN, PhD, CPMHN(C) *\*Corresponding author*  
11 University of Toronto, Lawrence S. Bloomberg Faculty of Nursing  
12 155 College Street; Suite 130, Toronto, ON, CAN M5T1P8, 4169468676  
13

14 Kathryn Bennett, PhD, Department of Health Research Methods, Evidence and Impact (formerly  
15 Clinical Epidemiology and Biostatistics), McMaster University, Hamilton, Canada  
16

17 Sarah Brennenstuhl, PhD, Lawrence S. Bloomberg Faculty of Nursing, University of Toronto,  
18 Toronto, Canada  
19

20 Amy Cheung, MD MSc Department of Psychiatry, Sunnybrook Health Sciences Centre and  
21 University of Toronto, Toronto, Canada  
22

23 Joanna Henderson, PhD CPsych, Margaret and Wallace McCain Centre for Child, Youth and  
24 Family Mental Health, Centre for Addiction and Mental Health, University of Toronto, Toronto,  
25 Canada  
26

27 Daphne Korczak, MD MSc, Department of Psychiatry, Hospital for Sick Children, Faculty of  
28 Medicine, University of Toronto, Toronto, Canada  
29

30 Paul Kurdyak, MD PhD Centre for Addiction and Mental Health, ICES, University of Toronto,  
31 Toronto, Canada  
32

33 Andrea Levinson, MD 0000-0002-4867-1992 MSc, Department of Psychiatry, CAMH,  
34 University of Toronto, Toronto, Canada  
35

36 Antonio Pignatiello MD Department of Psychiatry, University of Toronto and TeleLink Mental  
37 Health Program, The Hospital for Sick Children, Toronto, Canada  
38

39 Jennifer Stinson, PhD RN-EC, Research Institute, Hospital for Sick Children and Lawrence S  
40 Bloomberg Faculty of Nursing, University of Toronto, Toronto, Canada  
41

42 Aristotle Voineskos, MD PhD, Centre for Addiction and Mental Health, University of Toronto,  
43 Toronto, Canada  
44

45 Peter Szatmari MD Hospital for Sick Children, Centre for Addiction and Mental Health,  
46 University of Toronto, Toronto, Canada  
47

48 **Word Count:** 3501  
49  
50  
51  
52  
53

## ABSTRACT

### Introduction

Transition between health services is widely recognized as a problematic hurdle. Yet, the factors necessary for successful transition out of child and adolescent mental health services (CAMHS) as youth reach the service boundary at age 18 are poorly understood. Further, fragmentation and variability among the services provided by mental health organizations serve to exacerbate mental illness and create unnecessary challenges for youth and their families. The primary aim of the Longitudinal Youth in Transition Study (LYiTS) is to describe and model changes in psychiatric symptoms, functioning, and health service utilization at the transition out of CAMHS at age 18 and to identify key elements of the transition process that are amendable to interventions aimed at ensuring continuity of care.

### Methods and Analysis

A prospective longitudinal cohort study will be conducted to examine the association between psychiatric symptoms, functioning, and mental health and health service-use of youth aged 16-18 as they transition out of child mental health services at age 18. We will recruit a sample of (n = 350) participants from child and adolescent psychiatric programs at two hospital and two community mental health sites and conduct assessments annually for three years using standardized measures of psychiatric symptoms, functioning, and health service utilization.

### Ethics and Dissemination

Ethics approval has been obtained at all four recruitment sites. We will disseminate the results through conferences, open access publications, and webinars.

### Strengths

- LYiTS is the first prospective longitudinal cohort study conducted to track youths' experiences of transition in mental health care at age 18 in North America
- LYiTS will link self-reported private and public mental health service utilization data with a publicly funded administrative health services records database
- Youth will be recruited from both community and hospital sites

### Limitations

- While very detailed subject contact management plans have been developed with youth input, it is likely there will still be high rates of attrition
- This study is restricted to participants who can read/write in English

**Key Words:** Health Care Transitions, Mental Health, Youth, Cohort Study, Longitudinal

## INTRODUCTION

A high percentage of child-onset psychiatric disorders persist into adulthood[1]; thus, the need to transition from child to adult care is a reality for many youth. Yet the transition from child and adolescent mental health services (CAMHS) to adult mental health services (AMHS) is typically fragmented [2] and poorly coordinated [3,4]. Research from the US and UK has shown that mental health service utilization at the transition to adulthood declined up to 50–60% [5,6] As such, there is a need to identify youth who are most likely to experience poor continuity in mental health care transitions, resulting in negative health and social outcomes, and who may benefit from transition interventions. A recent systematic review on health care transition service models for child to adult physical health care services found that there was limited evidence to support the creation of standards of care or clinical guidelines for transitions [7]. This reflects the paucity of longitudinal data on transitions in care, transition planning, and post-transfer outcomes [8,9]. Studies are urgently needed to empirically derive individual and program-level risk factors for poor outcomes that are amenable to interventions [10].

In mental health care, effective transitions aim to ensure continuity of care through a planned health care process that addresses both the therapeutic and developmental needs of the youth [11]. The current hypothesis is that successful transitions from CAMHS to AMHS is contingent on the youth experiencing continuity of care and avoiding decrements in their mental health and functioning. Experiencing discontinuity in mental health care at age 18 has been associated with developing more severe and enduring mental health problems, increased frequency of risky behaviours, inadequate/improper medication monitoring, increased involvement with the justice system, and decreased social support from caregivers [6,12–15]. As such, to inform service delivery models and clinical interventions, clinicians and researchers have begun to propose criteria to assess continuity of care and evaluate the success of transitions from CAMHS to AMHS. One study, the Transition from CAMHS to Adult Mental Health Services (TRACK) project, retrospectively evaluated four elements of successful transitions (gradual preparation, transfer planning, periods of parallel care, and consistency of key worker [6,16]) in the medical records of 154 youth[6]. Most youth (78%) experienced suboptimal transitions (1–3 of these criteria), less than 5% experienced all 4, and 17% experienced none.

The TRACK study has been highly influential in reshaping the practices and policies of mental health transitions, including the development of National Institute for Health and Care Excellence (NICE) guidelines in the United Kingdom [17]. Stakeholders, including youth and their caregivers, clinicians, and administrators, are demanding similar practice and policy reform in other parts of the world, including Canada [3,18,19]. However, to-date there has been no published prospective longitudinal studies to inform policy-makers on the number of youth with mental illness who experience a disruptive transition in care from CAMHS at age 18, and the impact that a disruptive transition has on their mental health and functioning. These data are essential in strategic service planning of youth reaching 18 years. Our prospective longitudinal study will generate new knowledge that can address these gaps.

### Study aims

The primary aim of the Longitudinal Study of Child and Youth (LYiTS), is to document the mental health and functioning trajectories of youth aged 16-18 receiving CAMHS as they cross the CAMHS/AMHS transition boundary. The secondary aims are to: (2) examine specific

personal and service prognostic factors are associated with varied mental health and functioning trajectories; and (3) characterize the rates of mental health and primary care service use one-year before and one-year after transitioning out of CAMHS.

## **METHODS AND ANALYSIS**

### **Study design**

LYiTS is a prospective longitudinal cohort study of youth age 16-18 years who currently receive CAMHS and reach the CAMHS/AMHS transition boundary. Post-baseline follow-up data will be collected annually for 3 years [Time 1 (Baseline), Time 2 (12 months), Time 3 (24 months), Time 4 (36 months)] on a clinically-referred sample of youth receiving outpatient treatment in one of four CAMHS clinics. The age range of 16–18 years was chosen to ensure that data collection occurred over the transition boundary of age 18 years. Four time points were chosen to be long enough to reflect change in mental health, functioning, and experiences in transitions in mental health care.

### **Study setting**

Participants will be recruited from the Child, Youth and Family program at the Centre for Addiction and Mental Health (CAMH), the Department of Psychiatry at the Hospital for Sick Children ('SickKids'), the SickKids Centre for Community Mental Health (CCMH; formally known as the Hincks Dellcrest Centre], and The George Hull Centre for Children and Families (GHC), all in Toronto, Ontario, Canada. CAMH and SickKids are large tertiary hospitals that provide inpatient and outpatient services to youth with mental health problems, single-entry intakes, and research registries that will facilitate participant recruitment. CCMH and GHC are community mental health agencies with a structured intake team providing outpatient services, day treatment services, and adolescent residential programs. All sites serve adolescents, have an age 18 discharge requirement, and are located in Toronto, Ontario, Canada.

### **Study population**

#### ***Inclusion criteria***

Eligible participants are those who are 16 to 18 years old and are currently receiving outpatient treatment in CAMHS. All participants must be able to speak and read English. To be eligible, currently receiving services was defined as a youth having an appointment with a CAMHS clinician at least once, not including the initial consult/assessment, within the last 6 months.

#### ***Exclusion criteria***

The exclusion criteria include any youth who are enrolled in a single service that extends beyond age 18 (e.g., early intervention psychosis program) as these youth would experience different transitions in care. Also, any youth who is currently experiencing distress (e.g., psychosis or acuity requiring immediate hospitalization) will be excluded.

### **Sampling, recruitment and consent**

A comprehensive recruitment and contact management plan was developed in collaboration with stakeholders (youth, caregivers) and direct service clinicians. This recruitment plan was tested in the feasibility pilot and minor revisions were made. Consecutive eligible clients of CAMHS will be recruited for approximately 36-months starting from the time of REB approval at each site. We will recruit 350 youth aged 16–18 years across the four study sites proportional to the



1  
2  
3 eligible sample at the site. This age will ensure youth will cross the service age boundary of 18  
4 years.  
5

6  
7 At each recruitment site, youth are screened based on the eligibility criteria and deemed either  
8 eligible or ineligible to enroll. All youth who have a scheduled appointment during the  
9 recruitment period will be screened for eligibility. Once a youth is screened as eligible, a  
10 clinician from the circle of care (i.e., physician, nurse, social worker, psychologist) approaches  
11 the youth, provides them with a participation information letter about the study, and seeks  
12 agreement from the youth for a Research Assistant (RA) to meet with them to introduce the  
13 study. If the youth is agreeable, the RA meets with the youth to provide study information and  
14 answer questions. If, however, a youth prefers to discuss the project at a later time, they will be  
15 given a study information sheet and the RA will follow up via their preferred method of contact.  
16 Once the youth is agreeable to participate, consent is obtained, and the RA sets up a time to  
17 conduct the initial study visit. Given that the study is recruiting youth with identified mental  
18 health problems, who may not be receiving ongoing mental health care after the baseline  
19 assessment, a clinical back-up is always available to the RA, and youth will be given a handout  
20 on local service options should they need them. Recruitment for the feasibility pilot study  
21 occurred from June 2016-February 2017 at CAMH and CCMH. Recruitment for the study  
22 presented here commenced upon revised ethics board approval on February 2017 at CAMH and  
23 CCMH, and ethics approval on January 2018 at GHC, and September 2018 at Sickkids. Baseline  
24 recruitment is scheduled to conclude in July 2020. It is anticipated the final participant will  
25 complete all assessments in July 2023.  
26  
27  
28

### 29 **Data collection**

30  
31 Participants complete self-report study measures annually for 3 years following baseline,  
32 comprising four time points (T1-T4). The study measures take approximately 45-90 minutes to  
33 complete. A study RA remains with the participant during the completion of the self-report  
34 measures to address questions or concerns.  
35

### 36 **Measures**

37  
38 Participants complete all measures at all four time points, except the Youth Transition  
39 Questionnaire (YTQ) and the Continuity of Care in Children's Mental Health–Youth Version  
40 (C3MH-Y). The YTQ assesses pre-transition preparation and planning in CAMHS and the  
41 C3MH-Y measures relationships with CAMHS clinicians. As such both measures are only  
42 completed until the time point immediately following discharge from CAMHS.  
43

### 44 **Outcome Measures**

#### 45 ***Mental health and functioning***

46  
47 Youth will complete the Youth Self Report (YSR)[20], a 119-item scale which measures  
48 psychiatric symptoms and adaptive functioning. Items are rated as 0 (not true), 1 (somewhat or  
49 sometimes true), or 2 (very true or often true). The YSR yields dimensional 'total problem  
50 scores' of symptoms corresponding to the six most common DSM diagnoses among youth. Once  
51 youth turn 19 they will then complete the adult version (Adult Self Report; ASR[21]) of the  
52 YSR. Structured in the same way as the YSR, the ASR has 126 questions and assesses  
53 psychiatric symptoms and adaptive functioning. Mental health will also be assessed using three  
54 other measures to ensure a comprehensive assessment of mental health. The Strengths and  
55  
56  
57



Difficulties Questionnaire (SDQ) is a 25-item instrument comprised of 5 scales (emotional problems, conduct problems, hyperactivity, peer problems, and prosocial). Items are scored from 0 (not true), 1 (somewhat true) and 3 (certainly true). A total difficulties score is generated by summing scores from all scales except the prosocial scale, with a total possible score of 40 and higher scores indicting more problems[22,23]. The Difficulty in Emotional Regulation Scale (DERS) is a 36-item instrument that will be used to assess six aspects (nonacceptance, goals, impulse, awareness, strategies, and clarity) of emotion dysregulation[24]. Each of the items is scored using a 5-point scale (ranging from 1=almost never to 5=almost always), total scores range from 36-180 with greater scores indicating more emotion dysregulation. The CAGE-Adapted to Include Drugs (CAGE-AID) questionnaire will be used to identify high-risk alcohol disorders and other drug use problem behaviours[25]. This 4-item questionnaire is scored using 0 (no) and 1 (yes) with scores added for a possible total score of 4. A total score of 2 or greater is considered clinically significant. Functional impairment will be assessed using the Columbia Impairment Scale (CIS)[26], a 13-item scale which provides a global measure of impairment in 4 major areas of functioning: interpersonal relations (family and friends), broad psychopathological domains, functioning in job or schoolwork, and use of leisure time. Items are scored from 0 (no problem) to 4 (a very big problem), with higher total scores indicating poorer functioning.

## Predictors

### *Personal Characteristics*

To describe the basic characteristics of the study sample, youth will complete a basic demographic form. Personal characteristics such as social support, developmental maturity, and transition readiness will be measured at each time point. The Transition Readiness Assessment Questionnaire [27] measures youth's readiness (related to skills, knowledge, and self-efficacy) to transition from child-oriented to adult-oriented mental health services. The TRAQ is a 20-item instrument, scored on a 5-point Likert scale. Total scores (/100) will be generated, with higher scores indicating greater readiness and ability to negotiate the adult health care system [27,28]. Perceived social support will be assessed using the Multidimensional Scale of Perceived Social Support (MSPSS) [29]. The MSPSS is a 12-item instrument, measuring perception of social support with family, friends, and a significant other, measured on a 7-point Likert scale. A total score (/84) and domain specific scores (/28) are calculated with higher scores indicating greater perceived social support. Self-perceived maturity for handling tasks of emerging adulthood (ages 18-25 years) will be measured using the Inventory of the Dimensions of Emerging Adulthood (IDEAS) [30] a 31-item instrument measured on a 4-point Likert scale. Total scores will be generated, with higher scores indicating greater developmental maturity.

### *Service factors*

Youth will complete the Health and Social Service Utilization (HSSU) Measure[31], a structured interview that assesses use of health services that are billable (physician visits, emergency room visits) and non-billable (private therapist, community drop-in agencies, online/telephone counseling, school counsellor, etc.) to the government run health insurance plan. Linkage to

1  
2  
3 health insurance data (via the Ontario Health Insurance Plan, OHIP) will provide information  
4 about billable visits, including physician, emergency room, and ambulatory and hospital visits.  
5 Administrative health care data (OHIP), such as health care usage and costs (i.e., physician  
6 billings, hospital stays and emergency use) is housed at the Institute for Clinical Evaluative  
7 Sciences (ICES). Composite measures of health service utilization will be generated: (1) the total  
8 number of visits (all providers) in the 1-year pre- and 1-year post-CAMHS discharge; and (2) the  
9 total number of unscheduled (emergent) visits to the ER, walk-in clinic use, and  
10 telephone/internet crisis line use in the 1-year pre- and 1-year post- CAMHS discharge. Two  
11 other service-level factors will be reported at each time point, the length of service use and  
12 organization type. The length of service use with current mental health program/organization  
13 will be reported by youth and verified via OHIP in total months. The 4 recruitment sites  
14 represent different types of health care organizations and will be coded as a categorical nominal  
15 variable. CAMH is a psychiatric hospital with CAMHS and AMHS; SickKids is a pediatric  
16 hospital with only CAMHS; and GHC and CCMH are both community pediatric mental health  
17 organization with only CAMHS.  
18  
19  
20

### 21 ***Program factors***

22 Detailed descriptions of transition plans, preparation and youth's experience of continuity of care  
23 during the transition period will be assessed at each time point during the study. Transition plan  
24 and preparation experienced by the youth will be assessed using the Youth Transition  
25 Questionnaire (YTQ), composed of 6 items assessed in the TRACK Study [32]. The YTQ will  
26 be completed at each time point prior to transitioning out of CAMHS. YTQ items, scored using  
27 yes or no responses (with open-text comment boxes to expand), include: a) Has a transition or  
28 referral to adult mental health services been discussed with you at any of your recent meetings  
29 with your clinician/clinical team? b) Has a referral to adult mental health services been sent? c)  
30 Was the reason for moving to adult mental health services discussed with you? d) Were you  
31 provided with information about adult mental health services? (e) Were you involved in the  
32 discussion and decision making about when you would move to adult mental health services and  
33 where you would be going? f) Has your family (e.g., parents, siblings or partner) been involved  
34 in the discussion about moving to adult mental health services?  
35  
36  
37  
38

39 Youth will complete the Continuity of Care in Child Mental Health–Youth Version (C3MH-  
40 Y[33]). The core C3MH-Y module has 19 items, scored on a 5-point Likert scale with total  
41 higher scores indicating better engagement in care received in a CAMHS and covers the 3 core  
42 domains: management (collaboration); informational (provider knowledge); and relational  
43 (interpersonal) continuity [33,34]. Total scores on all 19 items at the time point preceding  
44 discharge from CAMHS will be used as a continuous predictor.  
45  
46

### 47 **Sample size**

48 Sample size calculations were conducted for the analytical technique that will be used in the  
49 primary research aim, Latent Growth and Growth Mixture Modeling (GMM). Monte Carlo  
50 simulations of latent growth curve models with at least 4 time points [35] indicate that a sample  
51 size of 250 is sufficient to achieve 80% power to detect a medium-sized effect of a predictor on  
52 the slope growth factor, using four time points. As growth mixture models are more complicated  
53 than Latent Growth Modeling, we increased this number by 100, resulting in a total of 350.  
54  
55

### 56 **Data analysis**

1  
2  
3 Overall, a general latent variable framework will be applied for analyses across Aims 1 and 2,  
4 starting with the latent growth and growth mixture modeling (GMM) to characterize  
5 developmental trajectories of the mental health and functioning predictors over the 3-year period.  
6 GMM will permit the identification of youth subgroups who follow distinct trajectories of mental  
7 health and functioning during the transition period. Separately for each outcome, latent growth  
8 models will be specified using a maximum likelihood (MLR) estimator to determine the overall  
9 trajectory. Next, the optimal number of classes will be decided using a range of criteria,  
10 including Bayesian Information Criteria, bootstrap likelihood ratio test (BLRT) of  $k$  versus  $k-1$   
11 groups and the entropy statistic. This analysis will be done using Mplus version 7[36], which  
12 uses full-information likelihood (FIML) estimation to account for missing data across  
13 assessments[37,38].  
14  
15

16  
17 For Aim 2, the three-step approach to GMM with covariate[35] will be used in Mplus 7 to  
18 determine predictors of classes of trajectories of mental health and functioning. After deciding on  
19 the optimal number of classes (see above), the most likely class variable will be created based on  
20 the posterior distribution for each outcome separately. The most likely class then will be  
21 regressed on the predictor variables using multinomial logistic regression, considering the  
22 misclassification in the second step.  
23  
24

25 Lastly, for Aim 3, the rate of mental health and primary care service use during the pre and post  
26 CAMHS discharge periods will be calculated by dividing the number of visits by the  
27 accumulated person months at risk (up to 1-year pre- and post-discharge). We used the latter  
28 specification of time to account for youth having observation periods of different lengths before  
29 and after discharge (i.e., some youth might be discharged before 18 while others may be  
30 discharged much later). Using conditional Poisson regression, we will calculate the Rate Ratio  
31 and its 95% confidence intervals comparing the rates pre and post CAMHS discharge periods  
32 [39]. This analysis will be undertaken using R[40]. For all analyses, two-sided  $p < 0.05$  will be  
33 defined as statistically significant.  
34  
35

### 36 **Methodological considerations**

37 Sample attrition (loss to follow-up) is inherent in longitudinal studies however recent advances  
38 in follow-up management models have demonstrated impressive retention rates (>90%) with  
39 similar populations [41–43]. Our retention plan incorporates: rapport-building with staff and  
40 youth; a dedicated research coordinator; a detailed contact management plan; providing  
41 honoraria to participants; and utilizing age-appropriate communication with youth (i.e., web, cell  
42 phone, text) and other family members including parents and grandparents (with youth consent).  
43  
44

### 45 **Data management and confidentiality**

46 All study data will be managed in accordance with the Tri-Agency principles of digital data  
47 management[44] and the Ontario *Personal Health Information Protection Act*. Survey data will  
48 be entered into Redcap [45] and downloaded securely into the study database held on a server at  
49 the lead study site (CAMH). Participant data will be linked to the health insurance administrative  
50 data at the Institute for Clinical Evaluative Sciences (ICES), which houses Ontario's health data.  
51 We will transfer the data directly from the CAMH Redcap server to a secure server at ICES via  
52 secure data transfer. At ICES the data will be accessible by a named Data Covenantor. The ICES  
53  
54  
55  
56  
57  
58  
59  
60

1  
2  
3 Covenantor will code the personal health information, replace it with an ICES key number, and  
4 transfer it to a moated server for the study project.  
5

## 6 **PATIENT AND PUBLIC INVOLVEMENT**

7  
8 The LYiTS study is funded by the Canadian Institute for Health Research (CIHR), Canada's  
9 federal funding agency for health research. CIHR advocates for patient-oriented research[46] and  
10 the inclusion of patients in the research process. As such, LYiTS has included youth and  
11 caregivers with lived experience through all phases of the design and management of the study.  
12 Partnering with the Margaret and Wallace McCain Centre for Child, Youth & Family Mental  
13 Health Youth Engagement Initiative (YEI) has been instrumental in ensuring the voice of youth  
14 has been incorporated throughout the LYiTS study[47]. Two youth from the YEI and one  
15 caregiver were knowledge user co-investigators on the grant application, providing feedback on  
16 the grant, the research questions, measures, and procedures. Youth and caregiver are active  
17 participants in the study Expert Advisory Committee (EAC). The EAC and co-investigators meet  
18 regularly to discuss the study protocol and the procedures. Youth have advised on several aspects  
19 of LYiTS, including: recruitment strategies (i.e., flyers and posters); contact management and  
20 retention tools; study measures and instruments; assessment instrument package; and the  
21 assessment package's length and readability. Additionally, as part of the EAC and knowledge  
22 translation plan, youth and caregivers will be included in the interpretation of findings and their  
23 presentation through various knowledge translation activities (e.g., presentations and  
24 publications).  
25  
26  
27

## 28 **ETHICS AND DISSEMINATION**

29  
30 This study protocol has been approved by the Research Ethics Boards (REBs) at all four  
31 recruitment sites. Any protocol modifications will be submitted to corresponding site  
32  
33 REBs. Results from this study will be disseminated based on a knowledge mobilization  
34 plan[48] developed in collaboration with the Expert Advisory Committee. These activities  
35 include, but are not limited to: (i) peer-reviewed open-access publications; (ii) tailored project  
36 summaries, developed with input from our knowledge users, created and disseminated through  
37 the study website and other mechanisms such as news and social media; (iii) workshops and  
38 presentations at national and international meetings. Study findings will be reported in  
39 accordance with the STROBE statement for cohort studies[49].  
40  
41  
42  
43  
44  
45  
46  
47  
48  
49  
50  
51  
52  
53  
54  
55  
56  
57  
58  
59  
60

1  
2  
3 **Acknowledgements** We are very grateful to the Expert Advisory Committee members,  
4 including youth from the CAMH Youth Engagement Initiative. We extend our thanks to the  
5 CAMHS services and clinicians who are collaborating in this study. KC held the CAMH Chair in  
6 Mental Health Nursing Research at the University of Toronto Lawrence S. Bloomberg Faculty of  
7 Nursing and the Centre for Addiction and Mental Health during the preparation of this protocol.  
8 The authors are grateful to the research assistants, undergraduate and graduate students who are  
9 contributing to the operationalization of the study, particularly Katye Stevens at the Centre for  
10 Addiction and Mental Health  
11  
12

13 **Contributors** KC is the principal investigator who conceived the original study design  
14 and obtained funding. All authors (KC, KB, PS, DK, AC, JH, AP, PK, AL, TP, JS, AV, SB)  
15 participated in revisions to the study design for important intellectual content. KC drafted the  
16 protocol, and all the authors read, revised, and approved the final version of the manuscript. SB  
17 is the statistician who led the calculation of the sample size, developed the analytical plan, and  
18 will undertake the statistical analysis.  
19  
20

21 **Funding** The LYiTS project has received funding from the Canadian Institutes of Health  
22 Research (CIHR) under grant agreement [PJT – 153334]. This paper reflects the authors' views.  
23 CIHR had no role in the study design, in writing the protocol, or in the decision to submit the  
24 protocol for publication.  
25  
26

27 **Competing interests** None.  
28  
29  
30  
31  
32  
33  
34  
35  
36  
37  
38  
39  
40  
41  
42  
43  
44  
45  
46  
47  
48  
49  
50  
51  
52  
53  
54  
55  
56  
57  
58  
59  
60



## References

- 1 Hofstra MB, Van der Ende J, Verhulst FC. Continuity and change of psychopathology from childhood into adulthood: A 14-year follow-up study. *Journal of the American Academy of Child & Adolescent Psychiatry* 2000;**39**:850–8. doi:10.1097/00004583-200007000-00013
- 2 Kessler R, Angermeyer M, Anthony J, *et al*. Lifetime prevalence and age-of-onset distributions of mental disorders in the World Health Organization's World Mental Health Survey Initiative. *World Psychiatry* 2007;**6**:168–76.
- 3 Davidson S, Cappelli M. We've got growing up to do: Policy and practice in youth mental health transitions. Ottawa, Ontario: Canada: 2011. [http://www.excellenceforchildandadolescent.ca/sites/default/files/resource/policy\\_growing\\_up\\_to\\_do.pdf](http://www.excellenceforchildandadolescent.ca/sites/default/files/resource/policy_growing_up_to_do.pdf) (accessed 7 Jan 2019).
- 4 Government of Ontario. Open minds, healthy minds: Ontario's comprehensive mental health and addiction strategy. 2011. [http://www.health.gov.on.ca/en/common/ministry/publications/reports/mental\\_health2011/mentalhealth\\_rep2011.pdf](http://www.health.gov.on.ca/en/common/ministry/publications/reports/mental_health2011/mentalhealth_rep2011.pdf)
- 5 Pottick KJ, Bilder S, Vander Stoep A, *et al*. US patterns of mental health service utilization for transition-age youth and young adults. *J Behav Health Serv Res* 2008;**35**:373–89. doi:10.1007/s11414-007-9080-4
- 6 Singh SP, Paul M, Ford T, *et al*. Process, outcome and experience of transition from child to adult mental healthcare: multiperspective study. *Br J Psychiatry* 2010;**197**:305–12. doi:10.1192/bjp.bp.109.075135
- 7 Betz CL, O'Kane LS, Nehring WM, *et al*. Systematic review: Health care transition practice service models. *Nurs Outlook* 2016;**64**:229–43. doi:10.1016/j.outlook.2015.12.011
- 8 Embrett MG, Randall GE, Longo CJ, *et al*. Effectiveness of Health System Services and Programs for Youth to Adult Transitions in Mental Health Care: A Systematic Review of Academic Literature. *Adm Policy Ment Health* 2016;**43**:259–69. doi:10.1007/s10488-015-0638-9
- 9 Schwartz LA, Brumley LD, Tuchman LK, *et al*. Stakeholder validation of a model of readiness for transition to adult care. *JAMA Pediatr* 2013;**167**:939–46. doi:10.1001/jamapediatrics.2013.2223
- 10 Coleman EA, Boult C, American Geriatrics Society Health Care Systems Committee. Improving the quality of transitional care for persons with complex care needs. *J Am Geriatr Soc* 2003;**51**:556–7.
- 11 Blum RWM, Garell D, Hodgman CH, *et al*. Transition from child-centered to adult health-care systems for adolescents with chronic conditions. *Journal of Adolescent Health* 1993;**14**:570–6. doi:10.1016/1054-139X(93)90143-D

- 12 Davis M. Addressing the Needs of Youth in Transition to Adulthood. *Administration and Policy in Mental Health and Mental Health Services Research* 2003;**30**:495–509. doi:10.1023/A:1025027117827
- 13 Health Canada. Reaching for the Top: A Report by the Advisor on Healthy Children and Youth. Published Online First: 2007. <http://www.hc-sc.gc.ca/hl-vs/pubs/child-enfant/advisorconseillere/index-eng.php#a15>
- 14 McGorry P. Transition to Adulthood: The Critical Period for Pre-emptive, Disease-modifying Care for Schizophrenia and Related Disorders. *Schizophrenia Bulletin* 2011;**37**:524–30. doi:10.1093/schbul/sbr027
- 15 Viner R. Transition from paediatric to adult care. Bridging the gaps or passing the buck? *Arch Dis Child* 1999;**81**:271–5.
- 16 Paul M, Ford T, Kramer T, *et al.* Transfers and transitions between child and adult mental health services. *The British Journal of Psychiatry* 2013;**202**:s36–40. doi:10.1192/bjp.bp.112.119198
- 17 National Institute for Health and Care Excellence. Transition from children’s to adults’ services for young people using health or social care services: NICE Guideline NG43. 2016. <https://www.nice.org.uk/guidance/ng43/resources/transition-from-childrens-to-adults-services-for-young-people-using-health-or-social-care-services-pdf-1837451149765> (accessed 3 Feb 2019).
- 18 Riosa PB, Preyde M, Porto ML. Transitioning to adult mental health services: Perceptions of adolescents with emotional and behavioral problems. *Journal of Adolescent Research* 2015;**30**:446–76. doi:10.1177/0743558415569730
- 19 Mental Health Commission of Canada. Taking the Next Step Forward: Building a Responsive Mental Health and Addictions Systems for Emerging Adults. Mental Health Commission of Canada. 2015. [https://www.mentalhealthcommission.ca/sites/default/files/Taking%252520the%252520Next%252520Step%252520Forward\\_0.pdf](https://www.mentalhealthcommission.ca/sites/default/files/Taking%252520the%252520Next%252520Step%252520Forward_0.pdf) (accessed 3 Feb 2019).
- 20 Achenbach TM, Rescorla LA. *Manual for the ASEBA school-age forms & profiles*. Burlington, VT: : University of Vermont, Research Center for Children, Youth, & Families 2001.
- 21 Achenbach TM, Rescorla LA. *Manual for the ASEBA adult forms & profiles*. Burlington, VT: : University of Vermont Research Center for Children, Youth & Families 2003.
- 22 Goodman A, Goodman R. Strengths and Difficulties Questionnaire as a Dimensional Measure of Child Mental Health. *Journal of the American Academy of Child & Adolescent Psychiatry* 2009;**48**:400–3. doi:10.1097/CHI.0b013e3181985068



- 1  
2  
3 23 Goodman R, Meltzer H, Bailey V. The strengths and difficulties questionnaire: A pilot study  
4 on the validity of the self-report version. *European Child & Adolescent Psychiatry*  
5 1998;**7**:125–30. doi:10.1007/s007870050057  
6  
7  
8 24 Gratz KL, Roemer L. Multidimensional Assessment of Emotion Regulation and  
9 Dysregulation: Development, Factor Structure, and Initial Validation of the Difficulties in  
10 Emotion Regulation Scale. *Journal of Psychopathology and Behavioral Assessment*  
11 2004;**26**:41–54. doi:10.1023/B:JOBA.0000007455.08539.94  
12  
13 25 Brown RL, Rounds LA. Conjoint screening questionnaires for alcohol and other drug abuse:  
14 criterion validity in a primary care practice. *Wis Med J* 1995;**94**:135–40.  
15  
16 26 Bird H, Shaffer D, Fisher P, *et al.* The Columbia-Impairment-Scale (CIS): Pilot Findings on  
17 a Measure of Global Impairment for Children and Adolescents. *Int J Methods Psychiatr Res*  
18 1993;**3**:167–76.  
19  
20  
21 27 Wood DL, Sawicki GS, Miller MD, *et al.* The Transition Readiness Assessment  
22 Questionnaire (TRAQ): its factor structure, reliability, and validity. *Acad Pediatr*  
23 2014;**14**:415–22. doi:10.1016/j.acap.2014.03.008  
24  
25 28 Sawicki GS, Lukens-Bull K, Yin X, *et al.* Measuring the Transition Readiness of Youth with  
26 Special Healthcare Needs: Validation of the TRAQ—Transition Readiness Assessment  
27 Questionnaire. *J Pediatr Psychol* 2011;**36**:160–71. doi:10.1093/jpepsy/jsp128  
28  
29  
30 29 Zimet GD, Dahlem NW, Zimet SG, *et al.* The Multidimensional Scale of Perceived Social  
31 Support. *Journal of Personality Assessment* 1988;**52**:30–41.  
32 doi:10.1207/s15327752jpa5201\_2  
33  
34 30 Reifman A, Arnett J, J. Colwell M. *Emerging Adulthood: Theory, Assessment and*  
35 *Application*. 2007. doi:10.5195/JYD.2007.359  
36  
37  
38 31 O’Mara L, Mueller D, Grypstra L, *et al.* Does stigma towards mental illness decrease for  
39 youth 13-18 years old after participating in school-based Youth Net Hamilton focus groups?  
40 2009.[http://www.excellenceforchildandyouth.ca/sites/default/files/gai\\_attach/rg-](http://www.excellenceforchildandyouth.ca/sites/default/files/gai_attach/rg-127_final_outcomes_report.pdf)  
41 [127\\_final\\_outcomes\\_report.pdf](http://www.excellenceforchildandyouth.ca/sites/default/files/gai_attach/rg-127_final_outcomes_report.pdf) (accessed 3 Feb 2019).  
42  
43 32 Singh SP, Paul M, Islam Z, *et al.* Transition from CAMHS to adult mental health services  
44 (TRACK): a study of policies, process and user and carer perspective (TRACK). 2010.  
45 [http://www.netscc.ac.uk/hsdr/files/project/SDO\\_FR\\_08-1613-117\\_V01.pdf](http://www.netscc.ac.uk/hsdr/files/project/SDO_FR_08-1613-117_V01.pdf) (accessed 15  
46 May 2017).  
47  
48  
49 33 Tobon JI, Reid GJ, Brown JB. Continuity of Care in Children’s Mental Health: Parent,  
50 Youth and Provider Perspectives. *Community Mental Health Journal* 2015;**51**:921–30.  
51 doi:10.1007/s10597-015-9873-5  
52  
53 34 Haggerty JL, Reid RJ, Freeman GK, *et al.* Continuity of care: a multidisciplinary review.  
54 *BMJ* 2003;**327**:1219–21. doi:10.1136/bmj.327.7425.1219  
55  
56  
57  
58  
59

- 1  
2  
3 35 Asparouhov T, Muthen B. Auxiliary Variables in Mixture Modeling: 3-Step Approaches  
4 Using Mplus. Mplus Web Notes: No. 15.  
5 2014.<http://www.statmodel.com/download/webnotes/webnote15.pdf> (accessed 11 Mar  
6 2019).  
7  
8  
9 36 Muthen LK, Muthen BO. *Mplus User's Guide*. Seventh Edition. Los Angeles, CA: 1998.  
10  
11 37 Little RJA, Rubin DB. *Statistical Analysis with Missing Data: Little/Statistical Analysis with*  
12 *Missing Data*. Hoboken, NJ, USA: : John Wiley & Sons, Inc. 2002.  
13 doi:10.1002/9781119013563  
14  
15 38 Bollen K, Curran P. *Latent Curve Models: A Structural Equation Approach*. Hoboken: : John  
16 Wiley & Sons 2006.  
17  
18 39 Armstrong BG, Gasparrini A, Tobias A. Conditional Poisson models: a flexible alternative to  
19 conditional logistic case cross-over analysis. *BMC Med Res Methodol* 2014;**14**:122.  
20 doi:10.1186/1471-2288-14-122  
21  
22  
23 40 Mair P, Wilcox R. Robust statistical methods in R using the WRS2 package. *Behav Res*  
24 Published Online First: 31 May 2019. doi:10.3758/s13428-019-01246-w  
25  
26 41 Meyers K, Webb A, Frantz J, *et al*. What does it take to retain substance-abusing adolescents  
27 in research protocols? Delineation of effort required, strategies undertaken, costs incurred,  
28 and 6-month post-treatment differences by retention difficulty. *Drug Alcohol Depend*  
29 2003;**69**:73–85.  
30  
31  
32 42 Boys A, Marsden J, Stillwell G, *et al*. Minimizing respondent attrition in longitudinal  
33 research: practical implications from a cohort study of adolescent drinking. *J Adolesc*  
34 2003;**26**:363–73.  
35  
36 43 Scott CK. A replicable model for achieving over 90% follow-up rates in longitudinal studies  
37 of substance abusers. *Drug Alcohol Depend* 2004;**74**:21–36.  
38 doi:10.1016/j.drugalcdep.2003.11.007  
39  
40  
41 44 Government of Canada. Tri-Agency Statement of Principles on Digital Data Management.  
42 Research Data Management.  
43 2016.[http://www.science.gc.ca/eic/site/063.nsf/eng/h\\_83F7624E.html?OpenDocument](http://www.science.gc.ca/eic/site/063.nsf/eng/h_83F7624E.html?OpenDocument)  
44 (accessed 3 Feb 2019).  
45  
46 45 Harris PA, Taylor R, Thielke R, *et al*. Research Electronic Data Capture (REDCap) - A  
47 metadata-driven methodology and workflow process for providing translational research  
48 informatics support. *J Biomed Inform* 2009;**42**:377–81. doi:10.1016/j.jbi.2008.08.010  
49  
50  
51 46 Canadian Institutes of Health Research. Strategy for Patient-Oriented Research - Patient  
52 Engagement Framework. 2014.[http://www.cihr-irsc.gc.ca/e/documents/spor\\_framework-](http://www.cihr-irsc.gc.ca/e/documents/spor_framework-en.pdf)  
53 [en.pdf](http://www.cihr-irsc.gc.ca/e/documents/spor_framework-en.pdf)  
54  
55  
56  
57  
58  
59  
60

- 1  
2  
3 47 Heffernan OS, Herzog TM, Schiralli JE, *et al.* Implementation of a youth-adult partnership  
4 model in youth mental health systems research: Challenges and successes. *Health Expect*  
5 2017;**20**:1183–8. doi:10.1111/hex.12554  
6  
7  
8 48 Canadian Institutes of Health Research. *Guide to Knowledge Translation Planning at CIHR*  
9 *Integrated and End-of-Grant Approaches*. Ottawa: : Canadian Institutes of Health Research  
10 2012. [http://www.cihr-irsc.gc.ca/e/documents/kt\\_lm\\_ktplan-en.pdf](http://www.cihr-irsc.gc.ca/e/documents/kt_lm_ktplan-en.pdf) (accessed 3 Feb 2019).  
11  
12 49 Elm E von, Altman DG, Egger M, *et al.* Strengthening the reporting of observational studies  
13 in epidemiology (STROBE) statement: guidelines for reporting observational studies. *BMJ*  
14 2007;**335**:806–8. doi:10.1136/bmj.39335.541782.AD  
15  
16  
17  
18  
19  
20  
21  
22  
23  
24  
25  
26  
27  
28  
29  
30  
31  
32  
33  
34  
35  
36  
37  
38  
39  
40  
41  
42  
43  
44  
45  
46  
47  
48  
49  
50  
51  
52  
53  
54  
55  
56  
57  
58  
59  
60

# BMJ Open

## Longitudinal Youth in Transition Study (LYiTS): Protocol for a multi-centre prospective cohort study of youth transitioning out of child and adolescent mental health services at age 18

|                                 |                                                                                                                                                                                                                                                                                                                                                                                                                                                                                                                                                                                                                                                                                                                                                                                                                                                                                                                                                                                                                                                                                                                                                                                                                                                                                      |
|---------------------------------|--------------------------------------------------------------------------------------------------------------------------------------------------------------------------------------------------------------------------------------------------------------------------------------------------------------------------------------------------------------------------------------------------------------------------------------------------------------------------------------------------------------------------------------------------------------------------------------------------------------------------------------------------------------------------------------------------------------------------------------------------------------------------------------------------------------------------------------------------------------------------------------------------------------------------------------------------------------------------------------------------------------------------------------------------------------------------------------------------------------------------------------------------------------------------------------------------------------------------------------------------------------------------------------|
| Journal:                        | <i>BMJ Open</i>                                                                                                                                                                                                                                                                                                                                                                                                                                                                                                                                                                                                                                                                                                                                                                                                                                                                                                                                                                                                                                                                                                                                                                                                                                                                      |
| Manuscript ID                   | bmjopen-2019-035744.R1                                                                                                                                                                                                                                                                                                                                                                                                                                                                                                                                                                                                                                                                                                                                                                                                                                                                                                                                                                                                                                                                                                                                                                                                                                                               |
| Article Type:                   | Protocol                                                                                                                                                                                                                                                                                                                                                                                                                                                                                                                                                                                                                                                                                                                                                                                                                                                                                                                                                                                                                                                                                                                                                                                                                                                                             |
| Date Submitted by the Author:   | 14-Jan-2020                                                                                                                                                                                                                                                                                                                                                                                                                                                                                                                                                                                                                                                                                                                                                                                                                                                                                                                                                                                                                                                                                                                                                                                                                                                                          |
| Complete List of Authors:       | Cleverley, Kristin; University of Toronto, Lawrence S. Bloomberg Faculty of Nursing; Centre for Addiction and Mental Health<br>Bennett, Kathryn; McMaster University Faculty of Health Sciences, Health Research Methods, Evidence and Impact (formerly Clinical Epidemiology and Biostatistics)<br>Brennenstuhl, Sarah; University of Toronto, Lawrence S. Bloomberg Faculty of Nursing<br>Cheung, Amy; Sunnybrook Health Sciences Centre; University of Toronto Faculty of Medicine, Psychiatry<br>Henderson, Joanna; Centre for Addiction and Mental Health, ; University of Toronto Faculty of Medicine, Psychiatry<br>Korczak, Daphne J.; Hospital for Sick Children Department of Psychiatry<br>Kurdyak, Paul; Centre for Addiction and Mental Health<br>Levinson, Andrea; University of Toronto, Faculty of Medicine; Centre for Addiction and Mental Health<br>Pignatiello, Antonio; University of Toronto Faculty of Medicine; Hospital for Sick Children Department of Psychiatry<br>Stinson, Jennifer; Hospital for Sick Children; University of Toronto, Lawrence S. Bloomberg Faculty of Nursing<br>Voineskos, Aristotle; Centre for Addiction and Mental Health; University of Toronto, Faculty of Medicine<br>Szatmari, Peter; Centre for Addiction and Mental Health |
| <b>Primary Subject Heading</b>: | Mental health                                                                                                                                                                                                                                                                                                                                                                                                                                                                                                                                                                                                                                                                                                                                                                                                                                                                                                                                                                                                                                                                                                                                                                                                                                                                        |
| Secondary Subject Heading:      | Health services research, Paediatrics                                                                                                                                                                                                                                                                                                                                                                                                                                                                                                                                                                                                                                                                                                                                                                                                                                                                                                                                                                                                                                                                                                                                                                                                                                                |
| Keywords:                       | cohort study, MENTAL HEALTH, health care transitions, longitudinal, youth                                                                                                                                                                                                                                                                                                                                                                                                                                                                                                                                                                                                                                                                                                                                                                                                                                                                                                                                                                                                                                                                                                                                                                                                            |
|                                 |                                                                                                                                                                                                                                                                                                                                                                                                                                                                                                                                                                                                                                                                                                                                                                                                                                                                                                                                                                                                                                                                                                                                                                                                                                                                                      |

SCHOLARONE™  
Manuscripts

1  
2  
3  
4  
5  
6  
7  
8  
9  
10  
11  
12  
13  
14  
15  
16  
17  
18  
19  
20  
21  
22  
23  
24  
25  
26  
27  
28  
29  
30  
31  
32  
33  
34  
35  
36  
37  
38  
39  
40  
41  
42  
43  
44  
45  
46  
47  
48  
49  
50  
51  
52  
53  
54  
55  
56  
57  
58  
59  
60

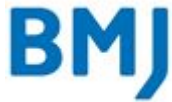

I, the Submitting Author has the right to grant and does grant on behalf of all authors of the Work (as defined in the below author licence), an exclusive licence and/or a non-exclusive licence for contributions from authors who are: i) UK Crown employees; ii) where BMJ has agreed a CC-BY licence shall apply, and/or iii) in accordance with the terms applicable for US Federal Government officers or employees acting as part of their official duties; on a worldwide, perpetual, irrevocable, royalty-free basis to BMJ Publishing Group Ltd ("BMJ") its licensees and where the relevant Journal is co-owned by BMJ to the co-owners of the Journal, to publish the Work in this journal and any other BMJ products and to exploit all rights, as set out in our [licence](#).

The Submitting Author accepts and understands that any supply made under these terms is made by BMJ to the Submitting Author unless you are acting as an employee on behalf of your employer or a postgraduate student of an affiliated institution which is paying any applicable article publishing charge ("APC") for Open Access articles. Where the Submitting Author wishes to make the Work available on an Open Access basis (and intends to pay the relevant APC), the terms of reuse of such Open Access shall be governed by a Creative Commons licence – details of these licences and which [Creative Commons](#) licence will apply to this Work are set out in our licence referred to above.

Other than as permitted in any relevant BMJ Author's Self Archiving Policies, I confirm this Work has not been accepted for publication elsewhere, is not being considered for publication elsewhere and does not duplicate material already published. I confirm all authors consent to publication of this Work and authorise the granting of this licence.

1  
2  
3 **Title:** Longitudinal Youth in Transition Study (LYiTS):  
4 Protocol for a multi-centre prospective cohort study of youth transitioning out of child and  
5 adolescent mental health services at age 18.  
6  
7

8  
9 **Authors:**

10 Kristin Cleverley RN, PhD, CPMHN(C) *\*Corresponding author*  
11 University of Toronto, Lawrence S. Bloomberg Faculty of Nursing  
12 155 College Street; Suite 130, Toronto, ON, CAN M5T1P8, 4169468676  
13 k.cleverley@utoronto.ca  
14

15  
16 Kathryn Bennett, PhD, Department of Health Research Methods, Evidence and Impact (formerly  
17 Clinical Epidemiology and Biostatistics), McMaster University, Hamilton, Canada  
18

19 Sarah Brennenstuhl, PhD, Lawrence S. Bloomberg Faculty of Nursing, University of Toronto,  
20 Toronto, Canada  
21

22  
23 Amy Cheung, MD MSc Department of Psychiatry, Sunnybrook Health Sciences Centre and  
24 University of Toronto, Toronto, Canada  
25

26 Joanna Henderson, PhD CPsych, Margaret and Wallace McCain Centre for Child, Youth and  
27 Family Mental Health, Centre for Addiction and Mental Health, University of Toronto, Toronto,  
28 Canada  
29

30  
31 Daphne Korczak, MD MSc, Department of Psychiatry, Hospital for Sick Children, Faculty of  
32 Medicine, University of Toronto, Toronto, Canada  
33

34 Paul Kurdyak, MD PhD Centre for Addiction and Mental Health, ICES, University of Toronto,  
35 Toronto, Canada  
36

37  
38 Andrea Levinson, MD 0000-0002-4867-1992 MSc, Department of Psychiatry, CAMH,  
39 University of Toronto, Toronto, Canada  
40

41 Antonio Pignatiello MD Department of Psychiatry, University of Toronto and TeleLink Mental  
42 Health Program, The Hospital for Sick Children, Toronto, Canada  
43

44  
45 Jennifer Stinson, PhD RN-EC, Research Institute, Hospital for Sick Children and Lawrence S  
46 Bloomberg Faculty of Nursing, University of Toronto, Toronto, Canada  
47

48 Aristotle Voineskos, MD PhD, Centre for Addiction and Mental Health, University of Toronto,  
49 Toronto, Canada  
50

51 Peter Szatmari MD Hospital for Sick Children, Centre for Addiction and Mental Health,  
52 University of Toronto, Toronto, Canada  
53

54  
55 **Word Count:** 3501  
56  
57  
58  
59  
60



## ABSTRACT

### Introduction

Transition between health services is widely recognized as a problematic hurdle. Yet, the factors necessary for successful transition out of child and adolescent mental health services (CAMHS) as youth reach the service boundary at age 18 are poorly understood. Further, fragmentation and variability among the services provided by mental health organizations serve to exacerbate mental illness and create unnecessary challenges for youth and their families. The primary aim of the Longitudinal Youth in Transition Study (LYiTS) is to describe and model changes in psychiatric symptoms, functioning, and health service utilization at the transition out of CAMHS at age 18 and to identify key elements of the transition process that are amendable to interventions aimed at ensuring continuity of care.

### Methods and Analysis

A prospective longitudinal cohort study will be conducted to examine the association between psychiatric symptoms, functioning, and mental health and health service-use of youth aged 16-18 as they transition out of child mental health services at age 18. We will recruit a sample of (n = 350) participants from child and adolescent psychiatric programs at two hospital and two community mental health sites and conduct assessments annually for three years using standardized measures of psychiatric symptoms, functioning, and health service utilization.

### Ethics and Dissemination

Ethics approval has been obtained at all four recruitment sites. We will disseminate the results through conferences, open access publications, and webinars.

### Strengths

- LYiTS is the first prospective longitudinal cohort study conducted to track youths' experiences of transition in mental health care at age 18 in North America
- LYiTS will link self-reported private and public mental health service utilization data with a publicly funded administrative health services records database
- Youth will be recruited from both community and hospital sites

### Limitations

- While very detailed subject contact management plans have been developed with youth input, it is likely there will still be high rates of attrition
- This study is restricted to participants who can read/write in English

**Key Words:** Health Care Transitions, Mental Health, Youth, Cohort Study, Longitudinal

## INTRODUCTION

A high percentage of child-onset psychiatric disorders persist into adulthood[1]; thus, the need to transition from child to adult care is a reality for many youth. Yet the transition from child and adolescent mental health services (CAMHS) to adult mental health services (AMHS) is typically fragmented [2] and poorly coordinated [3,4]. Research from the US and UK has shown that mental health service utilization at the transition to adulthood declined up to 50–60% [5,6] As such, there is a need to identify youth who are most likely to experience poor continuity in mental health care transitions, resulting in negative health and social outcomes, and who may benefit from transition interventions. A recent systematic review on health care transition service models for child to adult physical health care services found that there was limited evidence to support the creation of standards of care or clinical guidelines for transitions [7]. This reflects the paucity of longitudinal data on transitions in care, transition planning, and post-transfer outcomes [8,9]. Studies are urgently needed to empirically derive individual and program-level risk factors for poor outcomes that are amenable to interventions [10].

In mental health care, effective transitions aim to ensure continuity of care through a planned health care process that addresses both the therapeutic and developmental needs of the youth [11]. The current hypothesis is that successful transitions from CAMHS to AMHS is contingent on the youth experiencing continuity of care and avoiding decrements in their mental health and functioning. Experiencing discontinuity in mental health care at age 18 has been associated with developing more severe and enduring mental health problems, increased frequency of risky behaviours, inadequate/improper medication monitoring, increased involvement with the justice system, and decreased social support from caregivers [6,12–15]. As such, to inform service delivery models and clinical interventions, clinicians and researchers have begun to propose criteria to assess continuity of care and evaluate the success of transitions from CAMHS to AMHS. One study, the Transition from CAMHS to Adult Mental Health Services (TRACK) project, retrospectively evaluated four elements of successful transitions (gradual preparation, transfer planning, periods of parallel care, and consistency of key worker [6,16]) in the medical records of 154 youth[6]. Most youth (78%) experienced suboptimal transitions (1–3 of these criteria), less than 5% experienced all 4, and 17% experienced none.

The TRACK study has been highly influential in reshaping the practices and policies of mental health transitions, including the development of National Institute for Health and Care Excellence (NICE) guidelines in the United Kingdom [17]. Stakeholders, including youth and their caregivers, clinicians, and administrators, are demanding similar practice and policy reform in other parts of the world, including Canada [3,18,19]. However, to-date there has been no published prospective longitudinal studies to inform policy-makers on the number of youth with mental illness who experience a disruptive transition in care from CAMHS at age 18, and the impact that a disruptive transition has on their mental health and functioning. These data are essential in strategic service planning of youth reaching 18 years. Our prospective longitudinal study will generate new knowledge that can address these gaps.

### Study aims

The primary aim of the Longitudinal Study of Child and Youth (LYiTS), is to document the mental health and functioning trajectories of youth aged 16-18 receiving CAMHS as they cross the CAMHS/AMHS transition boundary. The secondary aims are to: (2) examine specific

personal and service prognostic factors are associated with varied mental health and functioning trajectories; and (3) characterize the rates of mental health and primary care service use one-year before and one-year after transitioning out of CAMHS.

## **METHODS AND ANALYSIS**

### **Study design**

LYiTS is a prospective longitudinal cohort study of youth age 16-18 years who currently receive CAMHS and reach the CAMHS/AMHS transition boundary. Post-baseline follow-up data will be collected annually for 3 years [Time 1 (Baseline), Time 2 (12 months), Time 3 (24 months), Time 4 (36 months)] on a clinically-referred sample of youth receiving outpatient treatment in one of four CAMHS clinics. The age range of 16–18 years was chosen to ensure that data collection occurred over the transition boundary of age 18 years. Four time points were chosen to be long enough to reflect change in mental health, functioning, and experiences in transitions in mental health care.

### **Study setting**

Participants will be recruited from the Child, Youth and Family program at the Centre for Addiction and Mental Health (CAMH), the Department of Psychiatry at the Hospital for Sick Children ('SickKids'), the SickKids Centre for Community Mental Health (CCMH; formally known as the Hincks Dellcrest Centre], and The George Hull Centre for Children and Families (GHC), all in Toronto, Ontario, Canada. CAMH and SickKids are large tertiary hospitals that provide inpatient and outpatient services to youth with mental health problems, single-entry intakes, and research registries that will facilitate participant recruitment. CCMH and GHC are community mental health agencies with a structured intake team providing outpatient services, day treatment services, and adolescent residential programs. All sites serve adolescents, have an age 18 discharge requirement, and are located in Toronto, Ontario, Canada.

### **Study population**

#### ***Inclusion criteria***

Eligible participants are those who are 16 to 18 years old and are currently receiving outpatient treatment in CAMHS. All participants must be able to speak and read English. To be eligible, currently receiving services was defined as a youth having an appointment with a CAMHS clinician at least once, not including the initial consult/assessment, within the last 6 months.

#### ***Exclusion criteria***

The exclusion criteria include any youth who are enrolled in a single service that extends beyond age 18 (e.g., early intervention psychosis program) as these youth would experience different transitions in care. Also, any youth who is currently experiencing distress (e.g., psychosis or acuity requiring immediate hospitalization) will be excluded.

### **Sampling, recruitment and consent**

A comprehensive recruitment and contact management plan was developed in collaboration with stakeholders (youth, caregivers) and direct service clinicians. This recruitment plan was tested in the feasibility pilot and minor revisions were made. Consecutive eligible clients of CAMHS will be recruited for approximately 36-months starting from the time of REB approval at each site. We will recruit 350 youth aged 16–18 years across the four study sites proportional to the

1  
2  
3 eligible sample at the site. This age will ensure youth will cross the service age boundary of 18  
4 years.  
5

6  
7 At each recruitment site, youth are screened based on the eligibility criteria and deemed either  
8 eligible or ineligible to enroll. All youth who have a scheduled appointment during the  
9 recruitment period will be screened for eligibility. Once a youth is screened as eligible, a  
10 clinician from the circle of care (i.e., physician, nurse, social worker, psychologist) approaches  
11 the youth, provides them with a participation information letter about the study, and seeks  
12 agreement from the youth for a Research Assistant (RA) to meet with them to introduce the  
13 study. If the youth is agreeable, the RA meets with the youth to provide study information and  
14 answer questions. If, however, a youth prefers to discuss the project at a later time, they will be  
15 given a study information sheet and the RA will follow up via their preferred method of contact.  
16 Once the youth is agreeable to participate, consent is obtained, and the RA sets up a time to  
17 conduct the initial study visit. Given that the study is recruiting youth with identified mental  
18 health problems, who may not be receiving ongoing mental health care after the baseline  
19 assessment, a clinical back-up is always available to the RA, and youth will be given a handout  
20 on local service options should they need them. Recruitment for the feasibility pilot study  
21 occurred from June 2016-February 2017 at CAMH and CCMH. Recruitment for the study  
22 presented here commenced upon revised ethics board approval on February 2017 at CAMH and  
23 CCMH, and ethics approval on January 2018 at GHC, and September 2018 at Sickkids. Baseline  
24 recruitment is scheduled to conclude in July 2020. It is anticipated the final participant will  
25 complete all assessments in July 2023.  
26  
27  
28

### 29 **Data collection**

30  
31 Participants complete self-report study measures annually for 3 years following baseline,  
32 comprising four time points (T1-T4). The study measures take approximately 45-90 minutes to  
33 complete. A study RA remains with the participant during the completion of the self-report  
34 measures to address questions or concerns.  
35

### 36 **Measures**

37  
38 Participants complete all measures at all four time points, except the Youth Transition  
39 Questionnaire (YTQ) and the Continuity of Care in Children's Mental Health–Youth Version  
40 (C3MH-Y). The YTQ assesses pre-transition preparation and planning in CAMHS and the  
41 C3MH-Y measures relationships with CAMHS clinicians. As such both measures are only  
42 completed until the time point immediately following discharge from CAMHS.  
43

### 44 **Outcome Measures**

#### 45 ***Mental health and functioning***

46  
47 Youth will complete the Youth Self Report (YSR)[20], a 119-item scale which measures  
48 psychiatric symptoms and adaptive functioning. Items are rated as 0 (not true), 1 (somewhat or  
49 sometimes true), or 2 (very true or often true). The YSR yields dimensional 'total problem  
50 scores' of symptoms corresponding to the six most common DSM diagnoses among youth. Once  
51 youth turn 19 they will then complete the adult version (Adult Self Report; ASR[21]) of the  
52 YSR. Structured in the same way as the YSR, the ASR has 126 questions and assesses  
53 psychiatric symptoms and adaptive functioning. Mental health will also be assessed using three  
54 other measures to ensure a comprehensive assessment of mental health. The Strengths and  
55  
56  
57

Difficulties Questionnaire (SDQ) is a 25-item instrument comprised of 5 scales (emotional problems, conduct problems, hyperactivity, peer problems, and prosocial). Items are scored from 0 (not true), 1 (somewhat true) and 3 (certainly true). A total difficulties score is generated by summing scores from all scales except the prosocial scale, with a total possible score of 40 and higher scores indicting more problems[22,23]. The Difficulty in Emotional Regulation Scale (DERS) is a 36-item instrument that will be used to assess six aspects (nonacceptance, goals, impulse, awareness, strategies, and clarity) of emotion dysregulation[24]. Each of the items is scored using a 5-point scale (ranging from 1=almost never to 5=almost always), total scores range from 36-180 with greater scores indicating more emotion dysregulation. The CAGE-Adapted to Include Drugs (CAGE-AID) questionnaire will be used to identify high-risk alcohol disorders and other drug use problem behaviours[25]. This 4-item questionnaire is scored using 0 (no) and 1 (yes) with scores added for a possible total score of 4. A total score of 2 or greater is considered clinically significant. Functional impairment will be assessed using the Columbia Impairment Scale (CIS)[26], a 13-item scale which provides a global measure of impairment in 4 major areas of functioning: interpersonal relations (family and friends), broad psychopathological domains, functioning in job or schoolwork, and use of leisure time. Items are scored from 0 (no problem) to 4 (a very big problem), with higher total scores indicating poorer functioning.

## Predictors

### ***Personal Characteristics***

To describe the basic characteristics of the study sample, youth will complete a basic demographic form. Personal characteristics such as social support, developmental maturity, and transition readiness will be measured at each time point. The Transition Readiness Assessment Questionnaire [27] measures youth's readiness (related to skills, knowledge, and self-efficacy) to transition from child-oriented to adult-oriented mental health services. The TRAQ is a 20-item instrument, scored on a 5-point Likert scale. Total scores (/100) will be generated, with higher scores indicating greater readiness and ability to negotiate the adult health care system [27,28]. Perceived social support will be assessed using the Multidimensional Scale of Perceived Social Support (MSPSS) [29]. The MSPSS is a 12-item instrument, measuring perception of social support with family, friends, and a significant other, measured on a 7-point Likert scale. A total score (/84) and domain specific scores (/28) are calculated with higher scores indicating greater perceived social support. Self-perceived maturity for handling tasks of emerging adulthood (ages 18-25 years) will be measured using the Inventory of the Dimensions of Emerging Adulthood (IDEAS) [30] a 31-item instrument measured on a 4-point Likert scale. Total scores will be generated, with higher scores indicating greater developmental maturity.

### ***Service factors***

Youth will complete the Health and Social Service Utilization (HSSU) Measure[31], a structured interview that assesses use of health services that are billable (physician visits, emergency room visits) and non-billable (private therapist, community drop-in agencies, online/telephone counseling, school counsellor, etc.) to the government run health insurance plan. Linkage to



1  
2  
3 health insurance data (via the Ontario Health Insurance Plan, OHIP) will provide information  
4 about billable visits, including physician, emergency room, and ambulatory and hospital visits.  
5 Administrative health care data (OHIP), such as health care usage and costs (i.e., physician  
6 billings, hospital stays and emergency use) is housed at the Institute for Clinical Evaluative  
7 Sciences (ICES). Composite measures of health service utilization will be generated: (1) the total  
8 number of visits (all providers) in the 1-year pre- and 1-year post-CAMHS discharge; and (2) the  
9 total number of unscheduled (emergent) visits to the ER, walk-in clinic use, and  
10 telephone/internet crisis line use in the 1-year pre- and 1-year post- CAMHS discharge. Two  
11 other service-level factors will be reported at each time point, the length of service use and  
12 organization type. The length of service use with current mental health program/organization  
13 will be reported by youth and verified via OHIP in total months. The 4 recruitment sites  
14 represent different types of health care organizations and will be coded as a categorical nominal  
15 variable. CAMH is a psychiatric hospital with CAMHS and AMHS; SickKids is a pediatric  
16 hospital with only CAMHS; and GHC and CCMH are both community pediatric mental health  
17 organization with only CAMHS.  
18  
19  
20  
21

### 22 ***Program factors***

23 Detailed descriptions of transition plans, preparation and youth's experience of continuity of care  
24 during the transition period will be assessed at each time point during the study. Transition plan  
25 and preparation experienced by the youth will be assessed using the Youth Transition  
26 Questionnaire (YTQ), composed of 6 items assessed in the TRACK Study [32]. The YTQ will  
27 be completed at each time point prior to transitioning out of CAMHS. YTQ items, scored using  
28 yes or no responses (with open-text comment boxes to expand), include: a) Has a transition or  
29 referral to adult mental health services been discussed with you at any of your recent meetings  
30 with your clinician/clinical team? b) Has a referral to adult mental health services been sent? c)  
31 Was the reason for moving to adult mental health services discussed with you? d) Were you  
32 provided with information about adult mental health services? (e) Were you involved in the  
33 discussion and decision making about when you would move to adult mental health services and  
34 where you would be going? f) Has your family (e.g., parents, siblings or partner) been involved  
35 in the discussion about moving to adult mental health services?  
36  
37  
38

39 Youth will complete the Continuity of Care in Child Mental Health–Youth Version (C3MH-  
40 Y[33]). The core C3MH-Y module has 19 items, scored on a 5-point Likert scale with total  
41 higher scores indicating better engagement in care received in a CAMHS and covers the 3 core  
42 domains: management (collaboration); informational (provider knowledge); and relational  
43 (interpersonal) continuity [33,34]. Total scores on all 19 items at the time point preceding  
44 discharge from CAMHS will be used as a continuous predictor.  
45  
46

### 47 **Sample size**

48 Sample size calculations were conducted for the analytical technique that will be used in the  
49 primary research aim, Latent Growth and Growth Mixture Modeling (GMM). Monte Carlo  
50 simulations of latent growth curve models with at least 4 time points [35] indicate that a sample  
51 size of 250 is sufficient to achieve 80% power to detect a medium-sized effect of a predictor on  
52 the slope growth factor, using four time points. As growth mixture models are more complicated  
53 than Latent Growth Modeling, we increased this number by 100, resulting in a total of 350.  
54  
55

### 56 **Data analysis**

Overall, a general latent variable framework will be applied for analyses across Aims 1 and 2, starting with the latent growth and growth mixture modeling (GMM) to characterize developmental trajectories of the mental health and functioning predictors over the 3-year period. GMM will permit the identification of youth subgroups who follow distinct trajectories of mental health and functioning during the transition period. Separately for each outcome, latent growth models will be specified using a maximum likelihood (MLR) estimator to determine the overall trajectory. Next, the optimal number of classes will be decided using a range of criteria, including Bayesian Information Criteria, bootstrap likelihood ratio test (BLRT) of  $k$  versus  $k-1$  groups and the entropy statistic. This analysis will be done using Mplus version 7[36], which uses full-information likelihood (FIML) estimation to account for missing data across assessments[37,38].

For Aim 2, the three-step approach to GMM with covariate[35] will be used in Mplus 7 to determine predictors of classes of trajectories of mental health and functioning. After deciding on the optimal number of classes (see above), the most likely class variable will be created based on the posterior distribution for each outcome separately. The most likely class then will be regressed on the predictor variables using multinomial logistic regression, considering the misclassification in the second step.

Lastly, for Aim 3, the rate of mental health and primary care service use during the pre and post CAMHS discharge periods will be calculated by dividing the number of visits by the accumulated person months at risk (up to 1-year pre- and post-discharge). We used the latter specification of time to account for youth having observation periods of different lengths before and after discharge (i.e., some youth might be discharged before 18 while others may be discharged much later). Using conditional Poisson regression, we will calculate the Rate Ratio and its 95% confidence intervals comparing the rates pre and post CAMHS discharge periods [39]. This analysis will be undertaken using R[40]. For all analyses, two-sided  $p < 0.05$  will be defined as statistically significant.

### **Methodological considerations**

Sample attrition (loss to follow-up) is inherent in longitudinal studies however recent advances in follow-up management models have demonstrated impressive retention rates (>90%) with similar populations [41–43]. Our retention plan incorporates: rapport-building with staff and youth; a dedicated research coordinator; a detailed contact management plan; providing honoraria to participants; and utilizing age-appropriate communication with youth (i.e., web, cell phone, text) and other family members including parents and grandparents (with youth consent).

### **Data management and confidentiality**

All study data will be managed in accordance with the Tri-Agency principles of digital data management[44] and the Ontario *Personal Health Information Protection Act*. Survey data will be entered into Redcap [45] and downloaded securely into the study database held on a server at the lead study site (CAMH). Participant data will be linked to the health insurance administrative data at the Institute for Clinical Evaluative Sciences (ICES), which houses Ontario's health data. We will transfer the data directly from the CAMH Redcap server to a secure server at ICES via secure data transfer. At ICES the data will be accessible by a named Data Covenantor. The ICES



1  
2  
3 Covenantor will code the personal health information, replace it with an ICES key number, and  
4 transfer it to a moated server for the study project.  
5

## 6 **PATIENT AND PUBLIC INVOLVEMENT**

7 The LYiTS study is funded by the Canadian Institute for Health Research (CIHR), Canada's  
8 federal funding agency for health research. CIHR advocates for patient-oriented research[46] and  
9 the inclusion of patients in the research process. As such, LYiTS has included youth and  
10 caregivers with lived experience through all phases of the design and management of the study.  
11 Partnering with the Margaret and Wallace McCain Centre for Child, Youth & Family Mental  
12 Health Youth Engagement Initiative (YEI) has been instrumental in ensuring the voice of youth  
13 has been incorporated throughout the LYiTS study[47]. Two youth from the YEI and one  
14 caregiver were knowledge user co-investigators on the grant application, providing feedback on  
15 the grant, the research questions, measures, and procedures. Youth and caregiver are active  
16 participants in the study Expert Advisory Committee (EAC). The EAC and co-investigators meet  
17 regularly to discuss the study protocol and the procedures. Youth have advised on several aspects  
18 of LYiTS, including: recruitment strategies (i.e., flyers and posters); contact management and  
19 retention tools; study measures and instruments; assessment instrument package; and the  
20 assessment package's length and readability. Additionally, as part of the EAC and knowledge  
21 translation plan, youth and caregivers will be included in the interpretation of findings and their  
22 presentation through various knowledge translation activities (e.g., presentations and  
23 publications).  
24  
25  
26  
27

## 28 **ETHICS AND DISSEMINATION**

29 This study protocol has been approved by the Research Ethics Boards (REBs) at all four  
30 recruitment sites. Any protocol modifications will be submitted to corresponding site  
31 REBs. Results from this study will be disseminated based on a knowledge mobilization  
32 plan[48] developed in collaboration with the Expert Advisory Committee. These activities  
33 include, but are not limited to: (i) peer-reviewed open-access publications; (ii) tailored project  
34 summaries, developed with input from our knowledge users, created and disseminated through  
35 the study website and other mechanisms such as news and social media; (iii) workshops and  
36 presentations at national and international meetings. Study findings will be reported in  
37 accordance with the STROBE statement for cohort studies[49].  
38  
39  
40  
41  
42  
43  
44  
45  
46  
47  
48  
49  
50  
51  
52  
53  
54  
55  
56  
57  
58  
59  
60

1  
2  
3 **Acknowledgements** We are very grateful to the Expert Advisory Committee members,  
4 including youth from the CAMH Youth Engagement Initiative. We extend our thanks to the  
5 CAMHS services and clinicians who are collaborating in this study. KC held the CAMH Chair in  
6 Mental Health Nursing Research at the University of Toronto Lawrence S. Bloomberg Faculty of  
7 Nursing and the Centre for Addiction and Mental Health during the preparation of this protocol.  
8 The authors are grateful to the research assistants, undergraduate and graduate students who are  
9 contributing to the operationalization of the study, particularly Katye Stevens at the Centre for  
10 Addiction and Mental Health  
11  
12

13 **Contributors** KC is the principal investigator who conceived the original study design  
14 and obtained funding. All authors (KC, KB, PS, DK, AC, JH, AP, PK, AL, TP, JS, AV, SB)  
15 participated in revisions to the study design for important intellectual content. KC drafted the  
16 protocol, and all the authors read, revised, and approved the final version of the manuscript. SB  
17 is the statistician who led the calculation of the sample size, developed the analytical plan, and  
18 will undertake the statistical analysis.  
19  
20

21 **Funding** The LYiTS project has received funding from the Canadian Institutes of Health  
22 Research (CIHR) under grant agreement [PJT – 153334]. This paper reflects the authors' views.  
23 CIHR had no role in the study design, in writing the protocol, or in the decision to submit the  
24 protocol for publication.  
25  
26

27 **Competing interests** None.  
28  
29  
30  
31  
32  
33  
34  
35  
36  
37  
38  
39  
40  
41  
42  
43  
44  
45  
46  
47  
48  
49  
50  
51  
52  
53  
54  
55  
56  
57  
58  
59  
60

## References

- 1 Hofstra MB, Van der Ende J, Verhulst FC. Continuity and change of psychopathology from childhood into adulthood: A 14-year follow-up study. *Journal of the American Academy of Child & Adolescent Psychiatry* 2000;**39**:850–8. doi:10.1097/00004583-200007000-00013
- 2 Kessler R, Angermeyer M, Anthony J, *et al*. Lifetime prevalence and age-of-onset distributions of mental disorders in the World Health Organization's World Mental Health Survey Initiative. *World Psychiatry* 2007;**6**:168–76.
- 3 Davidson S, Cappelli M. We've got growing up to do: Policy and practice in youth mental health transitions. Ottawa, Ontario: Canada: 2011. [http://www.excellenceforchildandyouth.ca/sites/default/files/resource/policy\\_growing\\_up\\_to\\_do.pdf](http://www.excellenceforchildandyouth.ca/sites/default/files/resource/policy_growing_up_to_do.pdf) (accessed 7 Jan 2019).
- 4 Government of Ontario. Open minds, healthy minds: Ontario's comprehensive mental health and addiction strategy. 2011. [http://www.health.gov.on.ca/en/common/ministry/publications/reports/mental\\_health2011/mentalhealth\\_rep2011.pdf](http://www.health.gov.on.ca/en/common/ministry/publications/reports/mental_health2011/mentalhealth_rep2011.pdf)
- 5 Pottick KJ, Bilder S, Vander Stoep A, *et al*. US patterns of mental health service utilization for transition-age youth and young adults. *J Behav Health Serv Res* 2008;**35**:373–89. doi:10.1007/s11414-007-9080-4
- 6 Singh SP, Paul M, Ford T, *et al*. Process, outcome and experience of transition from child to adult mental healthcare: multiperspective study. *Br J Psychiatry* 2010;**197**:305–12. doi:10.1192/bjp.bp.109.075135
- 7 Betz CL, O'Kane LS, Nehring WM, *et al*. Systematic review: Health care transition practice service models. *Nurs Outlook* 2016;**64**:229–43. doi:10.1016/j.outlook.2015.12.011
- 8 Embrett MG, Randall GE, Longo CJ, *et al*. Effectiveness of Health System Services and Programs for Youth to Adult Transitions in Mental Health Care: A Systematic Review of Academic Literature. *Adm Policy Ment Health* 2016;**43**:259–69. doi:10.1007/s10488-015-0638-9
- 9 Schwartz LA, Brumley LD, Tuchman LK, *et al*. Stakeholder validation of a model of readiness for transition to adult care. *JAMA Pediatr* 2013;**167**:939–46. doi:10.1001/jamapediatrics.2013.2223
- 10 Coleman EA, Boult C, American Geriatrics Society Health Care Systems Committee. Improving the quality of transitional care for persons with complex care needs. *J Am Geriatr Soc* 2003;**51**:556–7.
- 11 Blum RWM, Garell D, Hodgman CH, *et al*. Transition from child-centered to adult health-care systems for adolescents with chronic conditions. *Journal of Adolescent Health* 1993;**14**:570–6. doi:10.1016/1054-139X(93)90143-D

- 12 Davis M. Addressing the Needs of Youth in Transition to Adulthood. *Administration and Policy in Mental Health and Mental Health Services Research* 2003;**30**:495–509. doi:10.1023/A:1025027117827
- 13 Health Canada. Reaching for the Top: A Report by the Advisor on Healthy Children and Youth. Published Online First: 2007. <http://www.hc-sc.gc.ca/hl-vs/pubs/child-enfant/advisorconseillere/index-eng.php#a15>
- 14 McGorry P. Transition to Adulthood: The Critical Period for Pre-emptive, Disease-modifying Care for Schizophrenia and Related Disorders. *Schizophrenia Bulletin* 2011;**37**:524–30. doi:10.1093/schbul/sbr027
- 15 Viner R. Transition from paediatric to adult care. Bridging the gaps or passing the buck? *Arch Dis Child* 1999;**81**:271–5.
- 16 Paul M, Ford T, Kramer T, *et al.* Transfers and transitions between child and adult mental health services. *The British Journal of Psychiatry* 2013;**202**:s36–40. doi:10.1192/bjp.bp.112.119198
- 17 National Institute for Health and Care Excellence. Transition from children’s to adults’ services for young people using health or social care services: NICE Guideline NG43. 2016. <https://www.nice.org.uk/guidance/ng43/resources/transition-from-childrens-to-adults-services-for-young-people-using-health-or-social-care-services-pdf-1837451149765> (accessed 3 Feb 2019).
- 18 Riosa PB, Preyde M, Porto ML. Transitioning to adult mental health services: Perceptions of adolescents with emotional and behavioral problems. *Journal of Adolescent Research* 2015;**30**:446–76. doi:10.1177/0743558415569730
- 19 Mental Health Commission of Canada. Taking the Next Step Forward: Building a Responsive Mental Health and Addictions Systems for Emerging Adults. Mental Health Commission of Canada. 2015. [https://www.mentalhealthcommission.ca/sites/default/files/Taking%252520the%252520Next%252520Step%252520Forward\\_0.pdf](https://www.mentalhealthcommission.ca/sites/default/files/Taking%252520the%252520Next%252520Step%252520Forward_0.pdf) (accessed 3 Feb 2019).
- 20 Achenbach TM, Rescorla LA. *Manual for the ASEBA school-age forms & profiles*. Burlington, VT: : University of Vermont, Research Center for Children, Youth, & Families 2001.
- 21 Achenbach TM, Rescorla LA. *Manual for the ASEBA adult forms & profiles*. Burlington, VT: : University of Vermont Research Center for Children, Youth & Families 2003.
- 22 Goodman A, Goodman R. Strengths and Difficulties Questionnaire as a Dimensional Measure of Child Mental Health. *Journal of the American Academy of Child & Adolescent Psychiatry* 2009;**48**:400–3. doi:10.1097/CHI.0b013e3181985068

- 1  
2  
3 23 Goodman R, Meltzer H, Bailey V. The strengths and difficulties questionnaire: A pilot study  
4 on the validity of the self-report version. *European Child & Adolescent Psychiatry*  
5 1998;**7**:125–30. doi:10.1007/s007870050057  
6  
7  
8 24 Gratz KL, Roemer L. Multidimensional Assessment of Emotion Regulation and  
9 Dysregulation: Development, Factor Structure, and Initial Validation of the Difficulties in  
10 Emotion Regulation Scale. *Journal of Psychopathology and Behavioral Assessment*  
11 2004;**26**:41–54. doi:10.1023/B:JOBA.0000007455.08539.94  
12  
13 25 Brown RL, Rounds LA. Conjoint screening questionnaires for alcohol and other drug abuse:  
14 criterion validity in a primary care practice. *Wis Med J* 1995;**94**:135–40.  
15  
16 26 Bird H, Shaffer D, Fisher P, *et al.* The Columbia-Impairment-Scale (CIS): Pilot Findings on  
17 a Measure of Global Impairment for Children and Adolescents. *Int J Methods Psychiatr Res*  
18 1993;**3**:167–76.  
19  
20  
21 27 Wood DL, Sawicki GS, Miller MD, *et al.* The Transition Readiness Assessment  
22 Questionnaire (TRAQ): its factor structure, reliability, and validity. *Acad Pediatr*  
23 2014;**14**:415–22. doi:10.1016/j.acap.2014.03.008  
24  
25 28 Sawicki GS, Lukens-Bull K, Yin X, *et al.* Measuring the Transition Readiness of Youth with  
26 Special Healthcare Needs: Validation of the TRAQ—Transition Readiness Assessment  
27 Questionnaire. *J Pediatr Psychol* 2011;**36**:160–71. doi:10.1093/jpepsy/jsp128  
28  
29  
30 29 Zimet GD, Dahlem NW, Zimet SG, *et al.* The Multidimensional Scale of Perceived Social  
31 Support. *Journal of Personality Assessment* 1988;**52**:30–41.  
32 doi:10.1207/s15327752jpa5201\_2  
33  
34 30 Reifman A, Arnett J, J. Colwell M. *Emerging Adulthood: Theory, Assessment and*  
35 *Application*. 2007. doi:10.5195/JYD.2007.359  
36  
37  
38 31 O’Mara L, Mueller D, Grypstra L, *et al.* Does stigma towards mental illness decrease for  
39 youth 13-18 years old after participating in school-based Youth Net Hamilton focus groups?  
40 2009.[http://www.excellenceforchildandyouth.ca/sites/default/files/gai\\_attach/rg-](http://www.excellenceforchildandyouth.ca/sites/default/files/gai_attach/rg-127_final_outcomes_report.pdf)  
41 [127\\_final\\_outcomes\\_report.pdf](http://www.excellenceforchildandyouth.ca/sites/default/files/gai_attach/rg-127_final_outcomes_report.pdf) (accessed 3 Feb 2019).  
42  
43 32 Singh SP, Paul M, Islam Z, *et al.* Transition from CAMHS to adult mental health services  
44 (TRACK): a study of policies, process and user and carer perspective (TRACK). 2010.  
45 [http://www.netscc.ac.uk/hsdr/files/project/SDO\\_FR\\_08-1613-117\\_V01.pdf](http://www.netscc.ac.uk/hsdr/files/project/SDO_FR_08-1613-117_V01.pdf) (accessed 15  
46 May 2017).  
47  
48  
49 33 Tobon JI, Reid GJ, Brown JB. Continuity of Care in Children’s Mental Health: Parent,  
50 Youth and Provider Perspectives. *Community Mental Health Journal* 2015;**51**:921–30.  
51 doi:10.1007/s10597-015-9873-5  
52  
53 34 Haggerty JL, Reid RJ, Freeman GK, *et al.* Continuity of care: a multidisciplinary review.  
54 *BMJ* 2003;**327**:1219–21. doi:10.1136/bmj.327.7425.1219  
55  
56  
57  
58  
59  
60

- 1  
2  
3 35 Asparouhov T, Muthen B. Auxiliary Variables in Mixture Modeling: 3-Step Approaches  
4 Using Mplus. Mplus Web Notes: No. 15.  
5 2014.<http://www.statmodel.com/download/webnotes/webnote15.pdf> (accessed 11 Mar  
6 2019).  
7
- 8  
9 36 Muthen LK, Muthen BO. *Mplus User's Guide*. Seventh Edition. Los Angeles, CA: 1998.  
10
- 11 37 Little RJA, Rubin DB. *Statistical Analysis with Missing Data: Little/Statistical Analysis with*  
12 *Missing Data*. Hoboken, NJ, USA: : John Wiley & Sons, Inc. 2002.  
13 doi:10.1002/9781119013563  
14
- 15 38 Bollen K, Curran P. *Latent Curve Models: A Structural Equation Approach*. Hoboken: : John  
16 Wiley & Sons 2006.  
17
- 18 39 Armstrong BG, Gasparrini A, Tobias A. Conditional Poisson models: a flexible alternative to  
19 conditional logistic case cross-over analysis. *BMC Med Res Methodol* 2014;**14**:122.  
20 doi:10.1186/1471-2288-14-122  
21  
22
- 23 40 Mair P, Wilcox R. Robust statistical methods in R using the WRS2 package. *Behav Res*  
24 Published Online First: 31 May 2019. doi:10.3758/s13428-019-01246-w  
25
- 26 41 Meyers K, Webb A, Frantz J, *et al*. What does it take to retain substance-abusing adolescents  
27 in research protocols? Delineation of effort required, strategies undertaken, costs incurred,  
28 and 6-month post-treatment differences by retention difficulty. *Drug Alcohol Depend*  
29 2003;**69**:73–85.  
30  
31
- 32 42 Boys A, Marsden J, Stillwell G, *et al*. Minimizing respondent attrition in longitudinal  
33 research: practical implications from a cohort study of adolescent drinking. *J Adolesc*  
34 2003;**26**:363–73.  
35
- 36 43 Scott CK. A replicable model for achieving over 90% follow-up rates in longitudinal studies  
37 of substance abusers. *Drug Alcohol Depend* 2004;**74**:21–36.  
38 doi:10.1016/j.drugalcdep.2003.11.007  
39  
40
- 41 44 Government of Canada. Tri-Agency Statement of Principles on Digital Data Management.  
42 Research Data Management.  
43 2016.[http://www.science.gc.ca/eic/site/063.nsf/eng/h\\_83F7624E.html?OpenDocument](http://www.science.gc.ca/eic/site/063.nsf/eng/h_83F7624E.html?OpenDocument)  
44 (accessed 3 Feb 2019).  
45
- 46 45 Harris PA, Taylor R, Thielke R, *et al*. Research Electronic Data Capture (REDCap) - A  
47 metadata-driven methodology and workflow process for providing translational research  
48 informatics support. *J Biomed Inform* 2009;**42**:377–81. doi:10.1016/j.jbi.2008.08.010  
49  
50
- 51 46 Canadian Institutes of Health Research. Strategy for Patient-Oriented Research - Patient  
52 Engagement Framework. 2014.[http://www.cihr-irsc.gc.ca/e/documents/spor\\_framework-](http://www.cihr-irsc.gc.ca/e/documents/spor_framework-en.pdf)  
53 [en.pdf](http://www.cihr-irsc.gc.ca/e/documents/spor_framework-en.pdf)  
54  
55  
56  
57  
58  
59  
60

- 1  
2  
3 47 Heffernan OS, Herzog TM, Schiralli JE, *et al.* Implementation of a youth-adult partnership  
4 model in youth mental health systems research: Challenges and successes. *Health Expect*  
5 2017;**20**:1183–8. doi:10.1111/hex.12554  
6  
7  
8 48 Canadian Institutes of Health Research. *Guide to Knowledge Translation Planning at CIHR*  
9 *Integrated and End-of-Grant Approaches*. Ottawa: : Canadian Institutes of Health Research  
10 2012. [http://www.cihr-irsc.gc.ca/e/documents/kt\\_lm\\_ktplan-en.pdf](http://www.cihr-irsc.gc.ca/e/documents/kt_lm_ktplan-en.pdf) (accessed 3 Feb 2019).  
11  
12 49 Elm E von, Altman DG, Egger M, *et al.* Strengthening the reporting of observational studies  
13 in epidemiology (STROBE) statement: guidelines for reporting observational studies. *BMJ*  
14 2007;**335**:806–8. doi:10.1136/bmj.39335.541782.AD  
15  
16  
17  
18  
19  
20  
21  
22  
23  
24  
25  
26  
27  
28  
29  
30  
31  
32  
33  
34  
35  
36  
37  
38  
39  
40  
41  
42  
43  
44  
45  
46  
47  
48  
49  
50  
51  
52  
53  
54  
55  
56  
57  
58  
59  
60
