# Supplementary material for: Longitudinal Youth in Transition Study (LYiTS): protocol for a multicentre prospective cohort study of youth transitioning out of child and adolescent mental health services at age 18
Source: PubMed Central journal article supplement — BMJ Open. 2020 Feb 12;10(2):e035744. doi: 10.1136/bmjopen-2019-035744 (PMC7044859; doi:10.1136/bmjopen-2019-035744), 2020-02-12
Supplement: bmjopen-2019-035744.reviewer_comments.pdf [file bmjopen-2019-035744.reviewer_comments.pdf]

## PEER REVIEW HISTORY

BMJ Open publishes all reviews undertaken for accepted manuscripts. Reviewers are asked to complete a checklist review form (<http://bmjopen.bmj.com/site/about/resources/checklist.pdf>) and are provided with free text boxes to elaborate on their assessment. These free text comments are reproduced below.

## ARTICLE DETAILS

|                            |                                                                                                                                                                                                                                |
|----------------------------|--------------------------------------------------------------------------------------------------------------------------------------------------------------------------------------------------------------------------------|
| <b>TITLE (PROVISIONAL)</b> | Longitudinal Youth in Transition Study (LYITS): Protocol for a multi-centre prospective cohort study of youth transitioning out of child and adolescent mental health services at age 18                                       |
| <b>AUTHORS</b>             | Cleverley, Kristin; Bennett, Kathryn; Brennenstuhl, Sarah; Cheung, Amy; Henderson, Joanna; Korczak, Daphne J.; Kurdyak, Paul; Levinson, Andrea; Pignatiello, Antonio; Stinson, Jennifer; Voineskos, Aristotle; Szatmari, Peter |

This article was not externally reviewed at BMJ Open. Protocols that have been independently assessed prior to submission to BMJ Open are usually fast-tracked to publication on the grounds that further substantial changes will not be possible. This independent assessment will usually be external, independent review for both a substantial grant award from a non-commercial or government funder and ethics approval.
